# Supplementary material for: Measuring Community Disaster Resilience Using the ARC-D Toolkit: A Case Study of Jimma City, Southwest Ethiopia
Source: Research Square preprint supplement (doi:10.21203/rs.3.rs-8335798/v1), 2026-01-12
Supplement: Supplementary file 1 [file ff3b710f62738a30a7e1378c.docx]

**Guide for the Collection of Validations from Experts on the Findings of Community Disaster Resilience for Jimma City**

**Objective:**

For the qualitative validation of the results of the quantitative community survey conducted on the topic “ ”

The interview aims to gather expert opinions on the reasons, processes, and challenges associated with the observed phenomena of community disaster-resilience.

**Interviewees**

Key Informant Participants From:

Environmental Protection Office

Jimma Municipality

Urban Security Office

Urban Agriculture Office

Jimma Land Management Office

**Section 1: Disaster Resilience Profile**

1. There is quantitative evidence to show that Jimma City is more resilient to floods than to fire disasters. Why, from an institutional point of view, do you think that is so?
2. In specific kebeles (Ginjo, Ginjo Guduru, Heremata Merkato, Becho Bore), the effects of both flood and fire disasters tend to be more deleterious. On what grounds do such kebeles remain prone when compared to

**Section 2 - Risk Assessment and Planning**

1. It is evident from the survey that “Scientific Risk Assessment” has been ranked as a high priority activity. Can you clarify what kind of risk assessment has been carried out in Jimma City?
2. How are the outcomes of these risk evaluation processes integrated into urban development, land use, and disaster preparation?

**Section 3: Land Use & Community Resilience**

1. In respect to land use planning, the important questions here would be the following: What are the key factors contributing to low levels of community disaster resilience in the area of Jimma?
2. Are there any land use policies in existence which could contribute to higher levels of risk associated with disasters? If so, how?

**Section 4: Enabling & Constraining Factors**

1. How are the major factors, whether social aspects in general, the environment, institutional elements, and/or the economy, that worsen the vulnerability of the communities within the region of Jima
2. But what are the assets of the community that contribute to building its strength and capacity?

**Section 5: Institutional Coordination and Response**

1. Do various city agencies coordinate before, during, and after a disaster? Are there any official ways for agencies to collaborate?
2. What are the largest challenges facing your office in terms of disaster resiliency, and what is needed in order to address these challenges?

**Section 6: Recommendations and Future Directions**

1. In light of your experience, what do you believe to be the most critical three steps in making a disaster-resilient community in the City of Jimma, particularly within those kebeles most impacted by disasters?
2. How could community participation be better incorporated into DRR planning? “
